# Supplementary material for: Effects of Malate Ringer's solution on myocardial injury in sepsis and enforcement effects of TPP@PAMAM-MR
Source: Springer Nature journal article supplement (doi:10.1186/s12967-022-03811-y), 2022-12-13

A

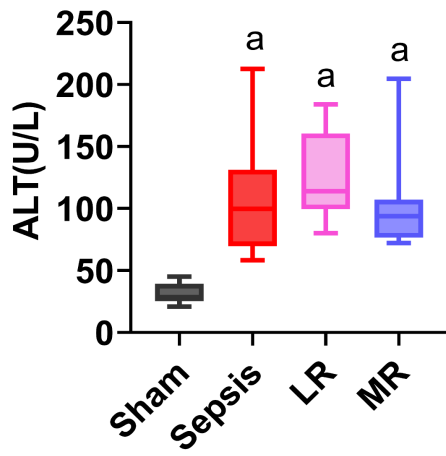

B

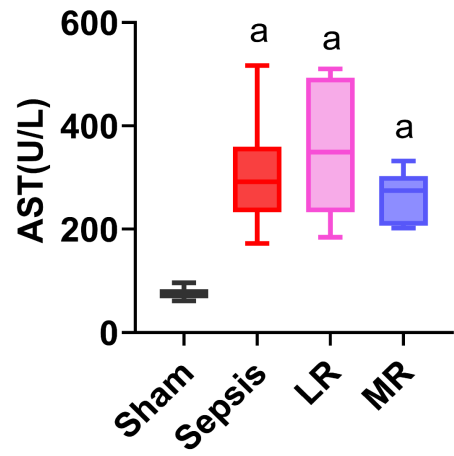

C

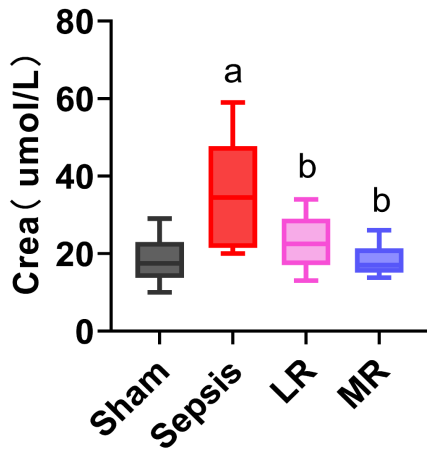

D

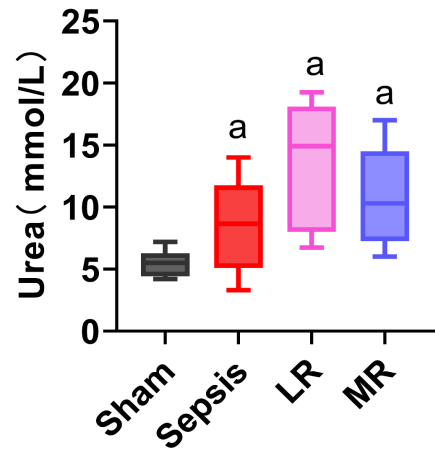

Supplement: MOESM2 [file 23821290]
